# Supplementary material for: A simple preparation of porous graphene nanosheets containing onion-like nano-holes with favorable high-rate Li-storage performance
Source: Royal Society of Chemistry journal article supplement (doi:10.1039/c6ra13905a), 2016-01-01
Supplement: c6ra13905a1.pdf [file c6ra13905a1.pdf]

## Supporting Information

### **A simple preparation of porous graphene nanosheets containing onion-like nano-holes with favorable high-rate Li-storage performance**

*Ranran Song,<sup>a,\*</sup> Bin Cao,<sup>b</sup> Di Zhang,<sup>a</sup> Huaihe Song<sup>b,\*</sup>*

---

<sup>a</sup>. Key Laboratory of Aerospace Advanced Materials and Performance of Ministry of Education, School of Materials Science and Engineering, Beihang University, Beijing, 100191, P.R. China.

E-mail: songranran2014@163.com

<sup>b</sup>. State Key Laboratory of Chemical Resource Engineering, Beijing Key Laboratory of Electrochemical Process and Technology for Materials, Beijing University of Chemical Technology, Beijing, 100029, P. R. China. E-mail: songhh@mail.buct.edu.cn.

† \* Corresponding authors.

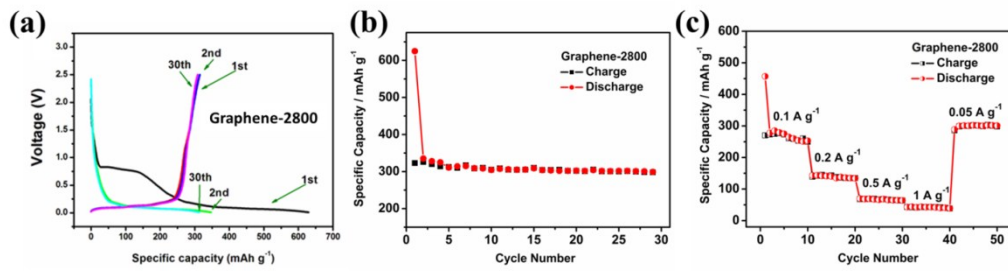

Figure S1. (a) Galvanostatic discharge/charge curves, (b) cycling performance at a current density of 50  $\text{mA g}^{-1}$ , and (c) rate performance at 0.05-1  $\text{A g}^{-1}$  of Graphene-2800 electrode.

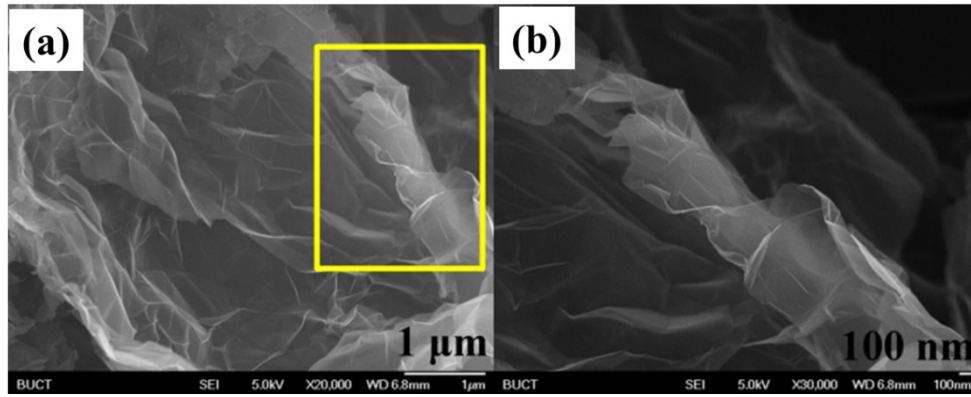

Figure S2. (a) SEM image of Graphene-2800 and (b) high resolution image of the marked area in (a).
